# Supplementary material
Source: publisher site journal article supplement (https://www.degruyter.com/publication/isbn/9783110312027/downloadAsset/9783110312027_Contents.pdf)
Supplement: Supplementary file 1 [file 9783110312027_Contents.pdf]

Contents

*Peter Auer, Martin Hilpert, Anja Stukenbrock, and Benedikt Szendrői*  
Integrating the perspectives on language and space . . . . . 1

**Section 1: Geography and variation across languages**

*Michael Cysouw*  
Disentangling geography from genealogy . . . . . 21

*Johanna Nichols*  
The vertical archipelago: Adding the third dimension to  
linguistic geography . . . . . 38

*Walter Bisang*  
Language contact between geographic and mental space . . . . . 61

*Commentary: The notion of space in linguistic typology*  
*(Ekkehard König)* . . . . . 101

**Section 2: Geography and variation within languages**

*Barbara Johnstone*  
Ideology and discourse in the enregisterment of regional variation . . 107

*Paul Kerswill*  
Identity, ethnicity and place: The construction of youth language in  
London . . . . . 128

*Bernd Kortmann*  
How powerful is geography as an explanatory factor in  
morphosyntactic variation? Areal features in the Anglophone world . 165

*Elvira Glaser*  
Area formation in morphosyntax . . . . . 195

*John Nerbonne*  
How much does geography influence language variation? . . . . . 222

|                                                                                                                                                |     |
|------------------------------------------------------------------------------------------------------------------------------------------------|-----|
| <i>Commentary: Lost in space? The many geographies and methodologies in research on variation within languages (Benedikt Szendrői)</i> . . . . | 240 |
|------------------------------------------------------------------------------------------------------------------------------------------------|-----|

### Section 3: Interactional spaces

*Lorenza Mondada*

|                                                                       |     |
|-----------------------------------------------------------------------|-----|
| Interactional space and the study of embodied talk-in-interaction . . | 247 |
|-----------------------------------------------------------------------|-----|

*Heiko Hausendorf*

|                                                                       |     |
|-----------------------------------------------------------------------|-----|
| On the interactive achievement of space – and its possible meanings . | 276 |
|-----------------------------------------------------------------------|-----|

*Jürgen Streeck*

|                                  |     |
|----------------------------------|-----|
| Plaza: Space or place? . . . . . | 304 |
|----------------------------------|-----|

*John B. Haviland*

|                                                                                                                        |     |
|------------------------------------------------------------------------------------------------------------------------|-----|
| <i>Xi to vi</i> : “Over that way, look!”: (Meta)spatial representation in an emerging (Mayan?) sign language . . . . . | 334 |
|------------------------------------------------------------------------------------------------------------------------|-----|

|                                                                                                                            |     |
|----------------------------------------------------------------------------------------------------------------------------|-----|
| <i>Commentary: What difference does space make for interaction and interaction for space? (Anja Stukenbrock)</i> . . . . . | 401 |
|----------------------------------------------------------------------------------------------------------------------------|-----|

### Section 4: Mobile spaces

*Pentti Haddington*

|                                                                     |     |
|---------------------------------------------------------------------|-----|
| Action and space: Navigation as a social and spatial task . . . . . | 411 |
|---------------------------------------------------------------------|-----|

*Elwys De Stefani*

|                                                                                                           |     |
|-----------------------------------------------------------------------------------------------------------|-----|
| Rearranging (in) space: On mobility and its relevance for the study of face-to-face interaction . . . . . | 434 |
|-----------------------------------------------------------------------------------------------------------|-----|

|                                                                                                                                                  |     |
|--------------------------------------------------------------------------------------------------------------------------------------------------|-----|
| <i>Commentary: Being mobile, talking on the move: Conceptual, analytical and methodological challenges of mobility (Lorenza Mondada)</i> . . . . | 464 |
|--------------------------------------------------------------------------------------------------------------------------------------------------|-----|

### Section 5: Mediated spaces

*Marco Jacquemet*

|                                                   |     |
|---------------------------------------------------|-----|
| Language, media, and digital landscapes . . . . . | 473 |
|---------------------------------------------------|-----|

*Michael Beißwenger*  
Space in computer-mediated communication: Corpus-based investigations on the use of local deictics in chats . . . . . 494

*Christian Mair and Stefan Pfänder*  
Vernacular and multilingual writing in mediated spaces: Web-forums for post-colonial communities of practice . . . . . 529

*Susanne Uhmann*  
Pointing in the abdomen . . . . . 557

*Commentary: Making space (Monica Heller)* . . . . . 601

**Section 6: Typology and spatial reasoning**

*Gisela Febrmann*  
Exploiting space in German Sign Language: Linguistic and topographic reference in signed discourse . . . . . 607

*Jürgen Bohnemeyer and Randi Tucker*  
Space in semantic typology: Object-centered geometries . . . . . 637

*Alan Cienki*  
Gesture, space, grammar, and cognition . . . . . 667

*Commentary: Is there a deictic of frame of reference? (Holger Diessel)* . . 687

Index . . . . . 693
